# Supplementary material
Source: HighWire-hosted journal article supplement (http://www.cmaj.ca/highwire/filestream/58849/field_highwire_adjunct_files/3/job-kivi-4-at.pdf)
Supplement: job-kivi-4-at.pdf [file job-kivi-4-at.pdf]

**Appendix 4: Association between lifestyle risk factors, job strain and risk of coronary artery disease after adjustment for age, sex, cohort and socioeconomic status (as supplied by authors)**

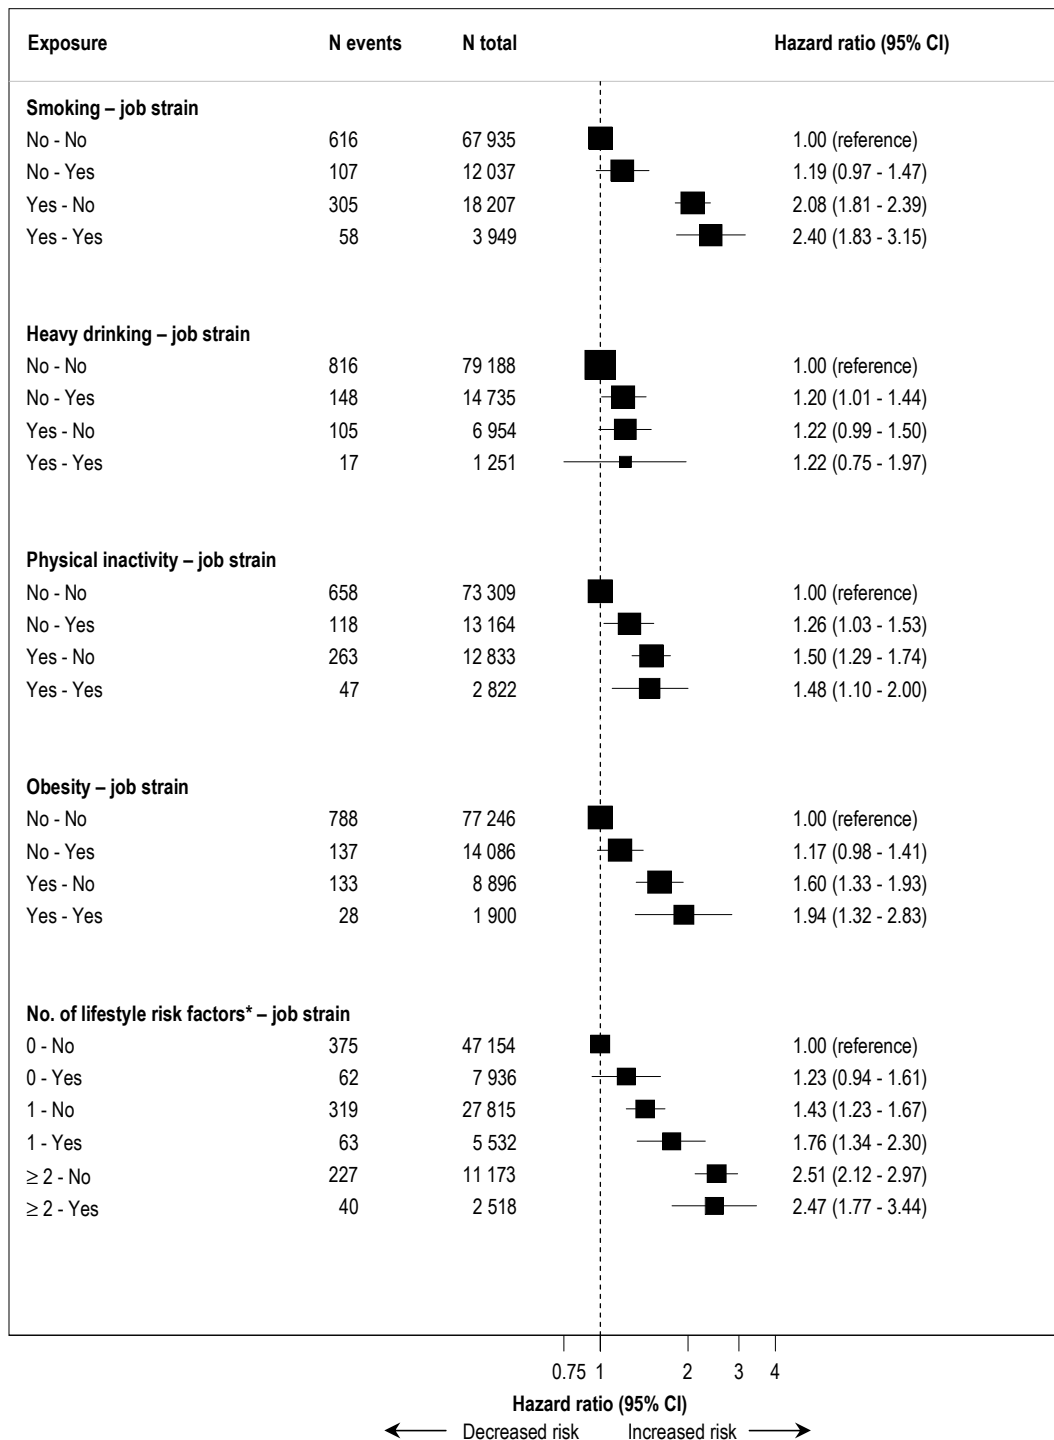

\*0 risk factors = healthy lifestyle; 1 risk factor = moderately unhealthy lifestyle; ≥ 2 risk factors = unhealthy lifestyle.
